# Supplementary material for: Missense mutations in CRX homeodomain cause dominant retinopathies through two distinct mechanisms
Source: eLife journal article supplement (doi:10.7554/elife.87147), 2023-04-25
Supplement: fig1-data1 [file elife-87147-fig1-data1-v1.pdf]

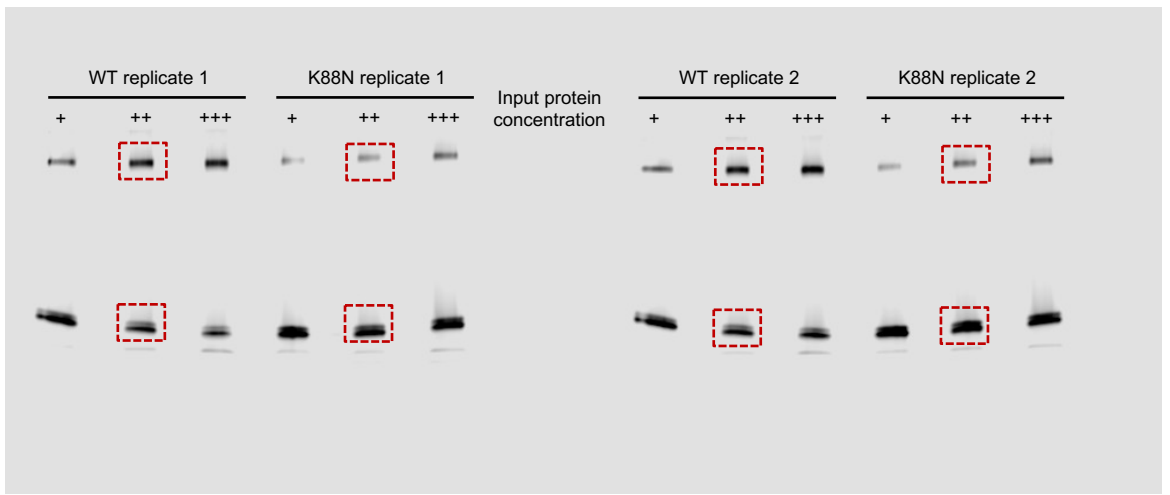

**Figure 1 – source data 1. Unprocessed Spec-seq EMSA gel image for WT and K88N HD.** DNA in bands highlighted by dashed rectangles were eluted and used for generating data in this study.
