# Supplementary material for: Missense mutations in CRX homeodomain cause dominant retinopathies through two distinct mechanisms
Source: eLife journal article supplement (doi:10.7554/elife.87147), 2023-04-25
Supplement: fig1-data2 [file elife-87147-fig1-data2-v1.pdf]

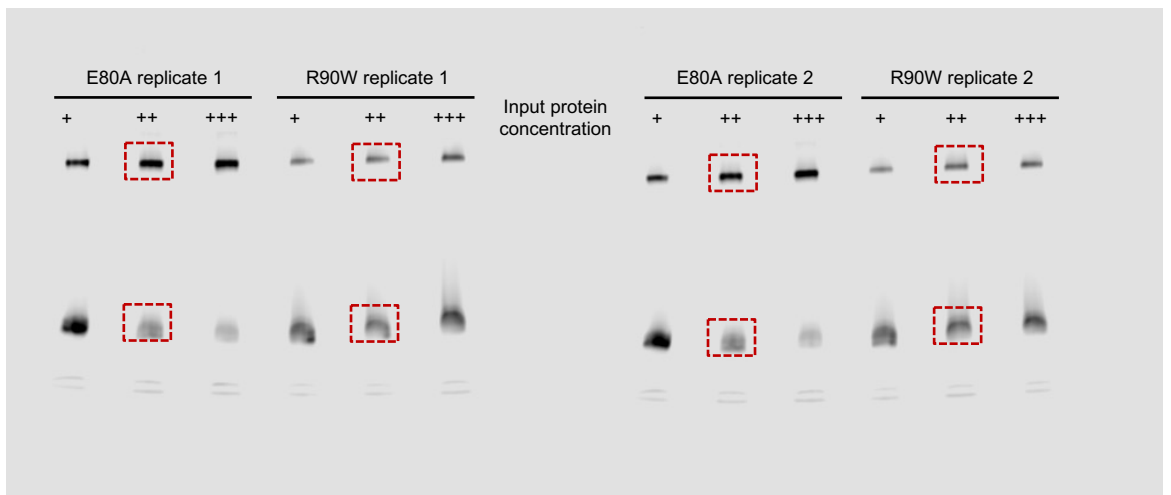

**Figure 1 – source data 2. Unprocessed Spec-seq EMSA gel image for E80A and R90W HD.** DNA in bands highlighted by dashed rectangles were eluted and used for generating data in this study.
