# Supplementary material for: Missense mutations in CRX homeodomain cause dominant retinopathies through two distinct mechanisms
Source: eLife journal article supplement (doi:10.7554/elife.87147), 2023-04-25
Supplement: fig1-figsupp2-data1 [file elife-87147-fig1-figsupp2-data1-v1.pdf]

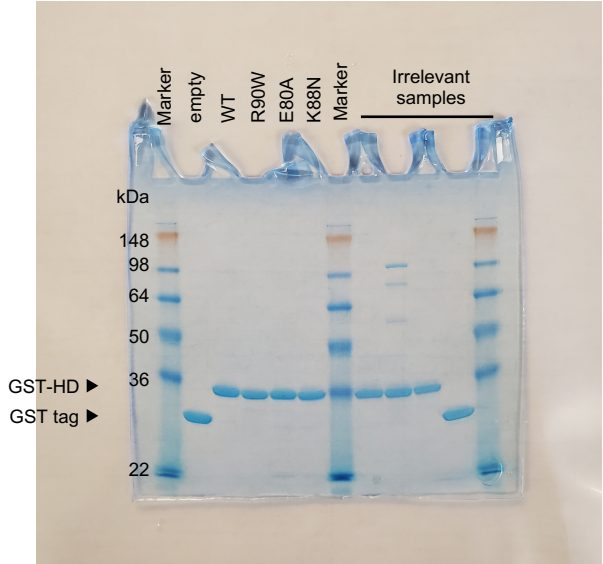

**Figure 1 – figure supplement 2 - source data. Unprocessed SDS-PAGE gel image of column-purified GST-HDs. M: SeeBlue™ Plus2 Pre-stained Protein Standard (Invitrogen, LC5925).**
