# Supplementary material for: Missense mutations in CRX homeodomain cause dominant retinopathies through two distinct mechanisms
Source: eLife journal article supplement (doi:10.7554/elife.87147), 2023-04-25
Supplement: fig2-figsupp1-data1 [file elife-87147-fig2-figsupp1-data1-v1.pdf]

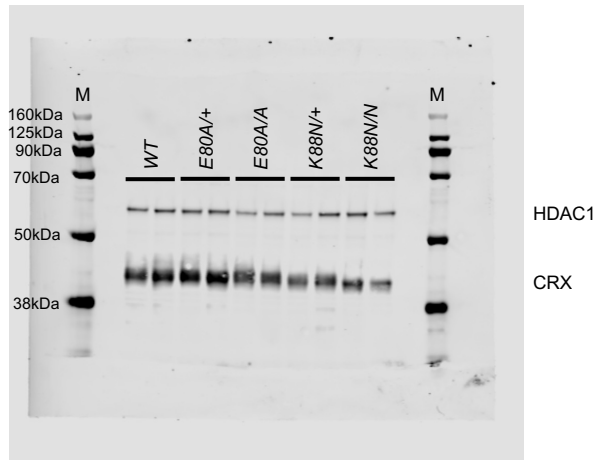

**Figure 2 – figure supplement 1 – source data. Unprocessed immunoblot of P14 retina nuclear extracts stained with anti-CRX and anti-HDAC1 antibodies. M: Chameleon® Duo Pre-stained Protein Ladder (LI-COR, 928-60000).**
